# Supplementary material
Source: MDPI journal article supplement (https://www.mdpi.com/1424-2818/15/9/986)
Supplement: s1 [file s1]

## Supplementary Material

# The Influence of Macroclimatic Drivers on the Macrophyte Phylogenetic Diversity in South African Estuaries

Dimitri Allastair Veldkornet

Department of Plant Sciences, Faculty of Natural and Agricultural Sciences, University of the Free State,  
P.O. Box 339, Bloemfontein 9300, South Africa; veldkornetda@ufs.ac.za

**Table S1.** Selection of species for phylogenetic diversity analysis.

| Species                                                               | # Estuaries | Matk       | RbcLa      |
|-----------------------------------------------------------------------|-------------|------------|------------|
| Acrostichum aureum L.                                                 | 4           | KF848284.1 | AB059613.1 |
| Atriplex vestita (Thunb.) Aellen                                      | 11          | MK529926   | MK521636   |
| Avicennia marina (Forssk.) Vierh.                                     | 8           | KX231342.1 | KX231354.1 |
| Barringtonia racemosa (L.) Sprengel.                                  | 29          | OL334021   | MK529927.1 |
| Bassia diffusa (Thunb.) Kuntze                                        | 67          | KJ510928.1 | M234799.1  |
| Bolboschoenus maritimus (L.) Palla                                    | 61          | HM850837.1 | F313185.1  |
| Bruguiera gymnorhiza (L.) Lam.                                        | 36          | KP725243.1 | U26320.2   |
| Centella asiatica (L.) Urb.                                           | 12          | JQ024945.1 | GQ436636.1 |
| Ceriops tagal (Perr.) C.B.Rob.                                        | 1           | KM255087.1 | DQ145950.1 |
| Chara vulgaris L.                                                     | 5           | MK521638.1 | AF097167.1 |
| Conyza scabrida DC. (Nidorella ivifolia (L.) J.C.Manning & Goldblatt) | 10          | MK529929.1 | AM234861.1 |
| Cotula coronopifolia L.                                               | 60          | MK521639   | MK529930   |
| Cynodon dactylon (L.) Pers.                                           | 65          | AF144584.1 | HM849930.1 |
| Cyperus laevigatus L.                                                 | 17          | MK521640.1 | MK529931.1 |
| Disphyma crassifolium (L.) L. Bolus                                   | 34          | HM850879.1 | AM234789.1 |
| Frankenia pulverulenta L.                                             | 10          | HM851067.1 | Z97638.1   |
| Halophila ovalis (R. Brown) J. D Hooker                               | 9           | AB002570.1 | KF278659.1 |
| Hibiscus tiliaceus L.                                                 | 55          | GU135115.1 | GU135284.1 |
| Isolepis cernua (Vahl) Roem. & Schult.                                | 4           | M850939.1  | HM850076.1 |
| Juncus acutus L.                                                      | 35          | HM850944.1 | HM850083.1 |
| Juncus littoralis C.A.Mey. (Juncus effusus)                           | 15          | HQ593334.1 | AY216609.1 |
| Limonium linifolium (L.f.) Kuntze                                     | 17          | NA         | MK529935.1 |
| Limonium scabrum (L.f.) Kuntze                                        | 37          | MK521641.1 | AM235050.1 |
| Lumnitzera racemosa Wild.                                             | 1           | KX231347.1 | KU761910.1 |
| Mesembryanthemum crystallinum                                         | 1           | JQ412264.1 | HM850175.1 |

|                                                                        |     |            |            |
|------------------------------------------------------------------------|-----|------------|------------|
| Phragmites australis                                                   | 200 | KJ772998.1 | U13229.1   |
| Plantago carnosa Forssk. (=Plantago crassifolia)                       | 11  | MK521643.1 | AM235049.1 |
| Poecilolepis ficoidea (DC.) Grau                                       | 3   | MK521644.1 | MK529937.1 |
| Ruppia cirrhosa (Pentag.) Grande                                       | 19  | KC505607.1 | MK529938.1 |
| Ruppia maritima L.                                                     | 17  | JX438642.1 | HQ901576.1 |
| Salicornia meyeriana Moss                                              | 43  | KU975355.1 | AM234802.1 |
| Salicornia pachystachya Bunge ex Ung.-Sternb                           | 2   | MK521645.1 | MK529940.1 |
| Salicornia uniflora Toelken                                            | 2   | MK521646.1 | MK529939.1 |
| Salsola kali (Pallas) Mosyakin                                         | 5   | KP149513.1 | AY270129.1 |
| Samolus porosus (L.f.) Thunb.                                          | 30  | MK521647.1 | MK529941.1 |
| Salicornia capensis (Moss) Piirainen & G.Kadereit                      | 1   | MK521648.1 | MK529942.1 |
| Salicornia decumbens (Toelken) Piirainen & G.Kadereit                  | 35  | MK521649.1 | MK529943.1 |
| Sarcocornia natalensis subsp. natalensis (Moss) Piirainen & G.Kadereit | 27  | MK521650.1 | MK529944.1 |
| Salicornia pillansii (Moss) Piirainen & G. Kadereit                    | 32  | MK521651.1 | KM984746.1 |
| Sarcocornia tegetaria S. Steffen, Mucina & G. Kadereit                 | 40  | KU975350.1 | KM984755.1 |
| Schoenoplectus triquetus f. Oppei (Weihe) Soó                          | 18  | LC219196.1 | GQ130367.1 |
| Schoenoplectus scirpoides (Schr.) Browning                             | 15  | MK521653.1 | MK529946.1 |
| Scirpus littoralis Schrad (Schoenoplectus littoralis)                  | 26  | KC123424.1 | EF178571.1 |
| Spartina maritima Sporobolus maritimus (Curtis) P.M.Peterson & Saarela | 22  | MK521654.1 | MK529947.1 |
| Spergularia media (L.) C.Presl ex Griseb                               | 6   | JN895335.1 | KX298990.1 |
| Sporobolus virginicus (L.) Kunth                                       | 137 | KJ773182.1 | J773930.1  |
| Stenotaphrum secundatum (H. Walter) Kuntze                             | 137 | KC123431.1 | EF137475.1 |
| Stuckenia pectinata (L.) Boerner                                       | 36  | JN894668.1 | JN894268.1 |
| Suaeda inflata Aellen                                                  | 2   | MK521655.1 | MK529948.1 |
| Suaeda fruticosa                                                       | 9   | KF679792.1 | KR057193.1 |
| Triglochin striata Ruiz & Pav.                                         | 56  | GQ452341.1 | GQ452336.1 |
| Zostera capensis Setch.                                                | 51  | AB096165.1 | AM235166.1 |
